# Supplementary material for: PER3 rs772027021 SNP induce pigmentation phenotypes of dyschromatosis universalis hereditaria
Source: Research Square preprint supplement (doi:10.21203/rs.3.rs-1668227/v1), 2022-06-01
Supplement: Supplementary file 1 [file 3293128b707bff50e3b691d0.docx]

**Supplemental Table S9** The annotation results of *GLMN* variant identified by exome sequencing and Sanger sequencing in the individuals of the DUH family.

| **Sample ID** | **Ⅰ-2** | **Ⅱ-3** | **Ⅱ-10** | **Ⅲ-12** | **Ⅱ-11** | **Ⅲ-14** |
| --- | --- | --- | --- | --- | --- | --- |
| **Variant** | 1:92754541  -CA-C | 1:92754541  -CA-C | 1:92754541  -CA-C | 1:92754541  -CA-C | 1:92754541  -CA-C | 1:92754541  -CA-C |
| **RS ID** | - | - | - | - | - | - |
| **Gene** | GLMN | GLMN | GLMN | GLMN | GLMN | GLMN |
| **Coding DNA change** | c.561delT | c.561delT | c.561delT | c.561delT | c.561delT | c.561delT |
| **Protein change** | p.F187fs | p.F187fs | p.F187fs | p.F187fs | p.F187fs | p.F187fs |
| **Zygosity** | het | het | het | het | het | het |
| **ACMG** | PVS1, PM2 | PVS1, PM2 | PVS1, PM2 | PVS1, PM2 | - | - |
| **ExonicFunc** | frameshift  deletion | frameshift  deletion | frameshift deletion | frameshift  deletion | - | - |
| - | - |  | |
| **SIFT,Polyphen2_HVAR,Polyphen2_HDIV,MutationTaster,CADD** | - | - | - | - | - | - |  | |
|  | | |
| **GnomAD_ALL_AF** | - | - | - | - | - | - |  | |
| **GnomAD_ALL_AN** | - | - | - | - | - | - |  | |
| **GnomAD_EAS_AF** | - | - | - | - | - | - |  | |
| **GnomAD_EAS_AN** | - | - | - | - | - | - |  | |
| **AF in 1000G_Chinese** | - | - | - | - | - | - |  | |
| **AF in**  **ExAC_EAS** | - | - | - | - | - | - |  | |
| **AF in Novo-Zhonghua-WES** | - | - | - | - | - | - |  | |
| **AF in Novo-Zhonghua-WGS** | - | - | - | - | - | - |  | |
