# Supplementary material for: PER3 rs772027021 SNP induce pigmentation phenotypes of dyschromatosis universalis hereditaria
Source: Research Square preprint supplement (doi:10.21203/rs.3.rs-1668227/v1), 2022-06-01
Supplement: Supplementary file 2 [file cd5ccc6246f00dd0bd319f24.docx]

**Supplemental Table S1 *PER3*** rs772027021 **SNP anda *SASH1* variant in the DUH family individuals who drew blood for identification of Sanger sequencing and their clinical characteristics.**

|  |  |  |  |  |  | **Number and distribution of hyperpigmented macules** | | | **Number and distribution of hypopigmented macules** | | |
| --- | --- | --- | --- | --- | --- | --- | --- | --- | --- | --- | --- |
| **Patient** | **Sex** | **Age range** | **Inheritance** | **Pathogenic gene(s)** | **Mutation site(s)** | **Face** | **Limbs** | **Trunk** | **Face** | **Limbs** | **Trunk** |
| Ⅲ-6 | F | 30-35 | Familial | PER3 | c.C517T, p.P173S | Extensive | Extensive | Extensive | Many | Many | Several |
| SASH1 | c.C1574G, p.T525R |
| Ⅱ-3 | M | 55-60 | Familial | PER3 | c.C517T, p.P173S | No | Several | Several | No | Many | Many |
| I-2 | F | 75-80 | Familial | PER3 | c.C517T, p.P173S | No | Several | Several | No | Many | Many |
| Ⅱ-10 | F | 50-55 | Familial | PER3 | c.C517T, p.P173S | No | Many | No | No | Several | No |
| II-11 | M | 45-49 | Familial | PER3 | c.C517T, p.P173S | Several | No | No | Several | No | No |
| III-12 | F | 30-35 | Familial | PER3 | c.C517T, p.P173S | No | Several | Several | No | Few | Few |
| III-9 | M | 25-30 | Familial | PER3 | c.C517T, p.P173S | No | No | No | No | No | No |
| II-1 | M | 55-60 | No | No | No | No | No | No | No | No | No |
| I-1 | M | 75-80 | No | No | No | No | No | No | No | No | No |
| II-2 | F | 55-60 | No | No | No | No | No | No | No | No | No |
| II-4 | F | 55-60 | No | No | No | No | No | No | No | No | No |
| II-9 | M | 51-55 | No | No | No | No | No | No | No | No | No |
| II-12 | F | 42-45 | No | No | No | No | No | No | No | No | No |
| II-13 | M | 41-45 | No | No | No | No | No | No | No | No | No |
| II-14 | F | 30-35 | No | No | No | No | No | No | No | No | No |
| III-1 | M | 35-40 | No | No | No | No | No | No | No | No | No |
| III-11 | M | 20-25 | No | No | No | No | No | No | No | No | No |
| III-13 | F | 10-15 | No | No | No | No | No | No | No | No | No |
| III-14 | M | 10-15 | No | No | No | No | No | No | No | No | No |
| III-16 | F | 0-5 | No | No | No | No | No | No | No | No | No |
| IV-1 | M | 16-20 | No | No | No | No | No | No | No | No | No |
| IV-2 | F | 11-15 | No | No | No | No | No | No | No | No | No |
