# Supplementary material for: PER3 rs772027021 SNP induce pigmentation phenotypes of dyschromatosis universalis hereditaria
Source: Research Square preprint supplement (doi:10.21203/rs.3.rs-1668227/v1), 2022-06-01
Supplement: Supplementary file 3 [file da99e3c44cbdd648f2bf2a0d.docx]

**Supplemental Table S5** The annotation results of *SFTA3* SNV identified by exome sequencing and the Sanger sequncing results in the affected individuals of the DUH family.

| **Sample ID** | Ⅰ-2 | Ⅱ-3 | II-7 | Ⅱ-10 | II-11 | Ⅲ-6 | Ⅲ-12 |
| --- | --- | --- | --- | --- | --- | --- | --- |
| **Variant** | 14:36946225-AG-A | 14:36  946225-AG-A | 14:36  946225-AG-A | 14:36  946225-AG-A | 14:36  946225-AG-A | 14:36946225-AG-A | 14:36946225-AG-A |
| **RS ID** | - | - | - | - | - | - | - |
| **Gene** | SFTA3 | SFTA3 | SFTA3 | SFTA3 | SFTA3 | SFTA3 | SFTA3 |
| **Coding DNA change** | c.211delC | c.211delC | c.211delC | c.211delC | c.211delC | c.211delC | c.211delC |
| **Protein change** | p.L71fs | p.L71fs | p.L71fs | p.L71fs | p.L71fs | p.L71fs | p.L71fs |
| **Zygosity** | het | het | het | het | het | het | het |
| **ACMG** | - | - | - | - | - | - | - |
| **ExonicFunc** | Frame  shift  deletion | Frame  shift deletion | - | Frame  shift  deletion | - | Frame  shift deletion | Frame  shift  deletion |
| **SIFT,Polyphen2_HVAR,Polyphen2_HDIV,MutationTaster,CADD** | ././././  11.52 | ././././  11.52 | - | ././././  11.52 | - | ././././  11.52 | ././././  11.52 |
| **GnomAD_ALL_AF** | - | - | - | - | - | - | - |
| **GnomAD_ALL_AN** | - | - | - | - | - | - | - |
| **GnomAD_EAS_AF** | - | - | - | - | - | - | - |
| **GnomAD_EAS_AN** | - | - | - | - | - | - | - |
| **AF in 1000G_Chinese** | **.** | **.** | **-** | **.** | **-** | **.** | **.** |
| **AF in ExAC_EAS** | **.** | **.** | **-** | **.** | **-** | **.** | **.** |
| **AF in Novo-Zhonghua-WES** | **.** | **.** | **-** | **.** | **-** | **.** | **.** |
| **AF in Novo-Zhonghua-WGS** | **.** | **.** | **-** | **.** | **-** | **.** | **.** |
